# Supplementary material for: Triggered Immune Response Induced by Antigenic Epitopes Covalently Linked with Immunoadjuvant‐Pulsed Dendritic Cells as a Promising Cancer Vaccine
Source: Hindawi journal article supplement (doi:10.1155/2020/3965061), 2020-01-01
Supplement: f1 [file 3965061.f1.pdf]

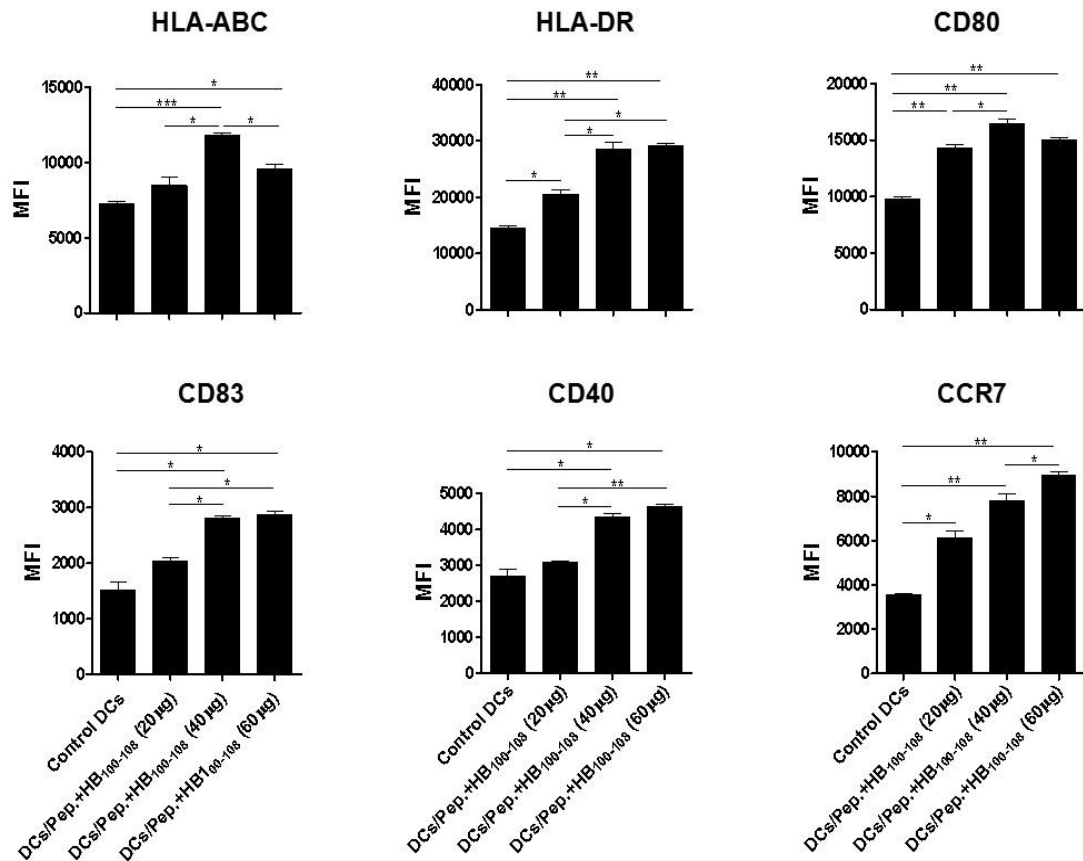

**Supplementary Figure 1: Determination the optimum concentration of peptides+HB<sub>100-108</sub> that promote the highest level of DCs maturation and activation.** Immature moDCs were left untreated or pulsed with peptides±HB<sub>100-108</sub> (each with 20, 40 or 60 µg/ml) for 1 hour at 37°C. Then, cells were washed and cultured overnight. The expression of HLA-ABC, HLA-DR, CD80, CD83, CD40 and CCR7 was measured by flow cytometry. Results represent the mean ± SEM of three independent experiments.
